# Supplementary material for: On the mechanism of action of arsenoplatins: arsenoplatin-1 binding to a B-DNA dodecamer
Source: Royal Society of Chemistry journal article supplement (doi:10.1039/d3dt04302a), 2024-01-01
Supplement: d3dt04302a1.pdf [file d3dt04302a1.pdf]

## Supporting Information

### On the mechanism of action of Arsenoplatins: Arsenoplatin-1 binding to a B-DNA dodecamer

Romualdo Troisi,<sup>a,b,‡</sup> Gabriella Tito,<sup>a,‡</sup> Giarita Ferraro,<sup>a</sup> Filomena Sica,<sup>a</sup> Lara Massai,<sup>c</sup> Andrea Geri,<sup>c</sup>  
Damiano Cirri,<sup>d</sup> Luigi Messori,<sup>c</sup> and Antonello Merlino<sup>\*a</sup>

<sup>a</sup> Department of Chemical Sciences, University of Naples Federico II, Complesso Universitario di Monte Sant'Angelo, via Cintia, 80126 Naples, Italy;

<sup>b</sup> Institute of Biostructures and Bioimaging, CNR, via Pietro Castellino 111, 80131 Naples, Italy;

<sup>c</sup> Department of Chemistry "U. Schiff", University of Florence, via della Lastruccia 3, 50019 Sesto Fiorentino, Italy;

<sup>d</sup> Department of Chemistry and Industrial Chemistry (DCCI), University of Pisa, Via Giuseppe Moruzzi 13, 56124 Pisa, Italy.

\* E-mail: [antonello.merlino@unina.it](mailto:antonello.merlino@unina.it)

‡ These authors equally contribute to this work.

|                                                                                                                                                                                                                                                                                                                                                    |    |
|----------------------------------------------------------------------------------------------------------------------------------------------------------------------------------------------------------------------------------------------------------------------------------------------------------------------------------------------------|----|
| <b>Table S1</b> Data collection and refinement statistics. Values in brackets refer to the highest resolution shell. 3                                                                                                                                                                                                                             |    |
| <b>Table S2</b> Anomalous signal close to Pt and As atoms in the structures of cisplatin/DNA, transplatin/DNA and AP-1/DNA adducts. Pt and As occupancies are also reported.....                                                                                                                                                                   | 5  |
| <b>Table S3.</b> X-ray structures of Pt-based drugs/DNA adducts reported in the PDB. Our structures are in bold ..                                                                                                                                                                                                                                 | 6  |
| <b>Fig. S1</b> Anomalous difference electron density maps (red, 3.0 $\sigma$ ) around the Pt centers in the cisplatin/DNA adduct.....                                                                                                                                                                                                              | 8  |
| <b>Fig. S2</b> Anomalous difference electron density maps at 3.0 $\sigma$ (red) around Pt centers in the transplatin/DNA adducts obtained upon (A) 48 h and (B) 7 days of soaking. ....                                                                                                                                                            | 9  |
| <b>Fig. S3</b> Anomalous difference electron density maps (red) around Pt and As in the AP-1/DNA adducts obtained upon (A) 4 h (3.0 $\sigma$ value) and (B) 48 h (2.0 $\sigma$ value) of soaking.....                                                                                                                                              | 10 |
| <b>Fig. S4</b> Superimposed structures of AP-1/DNA adducts formed upon 4 (orange) and 48 h (light blue) of soaking. The hexaaqua magnesium ion observed in the structure of the adduct formed upon 4 h of soaking occupies almost the same position adopted by Pt-As bimetallic center in the AP-1/DNA adducts obtained upon 48 h of soaking. .... | 11 |
| <b>Fig. S5</b> ESI MS spectrum of the Dickerson sequence (5'-CGCGAATTCGCG-3') and cisplatin, metal complex to DNA ratio 3:1, incubated for 48 h in 100 mM ammonium acetate buffer (pH=6.8) at the concentration of 10 <sup>-4</sup> M. ....                                                                                                        | 12 |
| <b>Fig. S6</b> ESI MS spectrum of the Dickerson sequence (5'-CGCGAATTCGCG-3') and transplatin, metal complex to DNA ratio 3:1, incubated for 48 h in 100 mM ammonium acetate buffer (pH=6.8) at the concentration of 10 <sup>-4</sup> M. ....                                                                                                      | 12 |
| <b>Fig. S7</b> ESI MS spectrum of the Dickerson sequence (5'-CGCGAATTCGCG-3') and AP-1, metal complex to DNA ratio 3:1, incubated for 24 h in 100 mM ammonium acetate buffer (pH=6.8) at the concentration of 10 <sup>-4</sup> M. ....                                                                                                             | 13 |

**Table S1** Data collection and refinement statistics. Values in brackets refer to the highest resolution shell.

|                                         | cisplatin/DNA adduct                          | AP-1/DNA adduct (4 h soaking)                 | AP-1/DNA adduct (48 h soaking)                | transplatin/DNA adduct (48h soaking)          | transplatin/DNA adduct (7d soaking)           |
|-----------------------------------------|-----------------------------------------------|-----------------------------------------------|-----------------------------------------------|-----------------------------------------------|-----------------------------------------------|
| <b>Crystal data</b>                     |                                               |                                               |                                               |                                               |                                               |
| Space group                             | P2 <sub>1</sub> 2 <sub>1</sub> 2 <sub>1</sub> |
| Unit-cell parameters                    |                                               |                                               |                                               |                                               |                                               |
| a, b, c (Å)                             | 24.72, 41.00, 66.48                           | 25.51, 40.73, 65.85                           | 39.97, 65.67, 23.56                           | 25.50 40.20, 65.60                            | 25.56, 40.39, 65.67                           |
| α, β, γ (°)                             | 90.00, 90.00, 90.00                           | 90.00, 90.00, 90.00                           | 90.00, 90.00, 90.00                           | 90.00, 90.00, 90.00                           | 90.00, 90.00, 90.00                           |
| No. of molecules in the asymmetric unit | 1 duplex                                      |
| <b>Data collection</b>                  |                                               |                                               |                                               |                                               |                                               |
| Resolution limits (Å)                   | 23.17 – 2.31 (2.35 – 2.31)                    | 34.64 – 1.52 (1.55 – 1.52)                    | 34.14 – 2.51 (2.55 – 2.51)                    | 25.47 – 1.41 (1.45 – 1.41)                    | 34.40 – 1.40 (1.42 – 1.40)                    |
| No. of observations                     | 38543 (1937)                                  | 126537 (6273)                                 | 24779 (1249)                                  | 121269 (2369)                                 | 135194 (6641)                                 |
| No. of unique reflections               | 3221 (148)                                    | 11057 (530)                                   | 2357 (118)                                    | 12070 (490)                                   | 13972 (698)                                   |
| Completeness (%)                        | 99.1 (100.0)                                  | 99.7 (100.0)                                  | 99.8 (100.0)                                  | 89.9 (51.9)                                   | 98.9 (100.0)                                  |
| <I/σ(I)>                                | 22.0 (2.5)                                    | 22.4 (2.3)                                    | 13.7 (2.1)                                    | 30.50 (2.5)                                   | 13.2 (0.9)                                    |
| Average multiplicity                    | 12.0 (13.1)                                   | 11.4 (11.8)                                   | 10.5 (10.6)                                   | 10.0 (4.8)                                    | 9.7 (9.5)                                     |
| CC <sub>1/2</sub>                       | 1.0 (0.9)                                     | 1.0 (0.8)                                     | 1.0 (0.9)                                     | 0.999 (0.832)                                 | 0.998 (0.601)                                 |
| <b>Refinement</b>                       |                                               |                                               |                                               |                                               |                                               |
| Resolution limits (Å)                   | 23.17 – 2.31                                  | 34.64 – 1.52                                  | 34.14 – 2.51                                  | 25.45 – 1.41                                  | 34.40 – 1.40                                  |
| No. of reflections                      | 2894                                          | 10514                                         | 2064                                          | 11444                                         | 11739                                         |
| R <sub>factor</sub> /R <sub>free</sub>  | 0.231/0.266                                   | 0.238/0.261                                   | 0.179/0.232                                   | 0.189/0.229                                   | 0.218/ 0.256                                  |
| No. of atoms                            | 499                                           | 569                                           | 493                                           | 610                                           | 603                                           |
| Mean B value (Å <sup>2</sup> )          | 52.8                                          | 33.6                                          | 59.1                                          | 17.2                                          | 19.1                                          |
| RMSD from ideal values                  |                                               |                                               |                                               |                                               |                                               |
| Bond lengths (Å)                        | 0.003                                         | 0.004                                         | 0.007                                         | 0.011                                         | 0.010                                         |

|                                     |                     |           |                |       |                   |
|-------------------------------------|---------------------|-----------|----------------|-------|-------------------|
| <b>Bond angles (°)</b>              | 1.730               | 2.132     | 2.344          | 3.199 | 1.931             |
| <b>Pt occupancy</b>                 | 0.50/0.60/0.50/0.65 | 0.20/0.20 | 0.15/0.40/0.25 | 0.20  | 0.25/0.30/0.30    |
| <b>Pt B-factors (Å<sup>2</sup>)</b> | 84.1/78.8/71.8/85.5 | 57.9/39.3 | 62.3/86.9/66.4 | 38.83 | 27.44/61.52/65.28 |
| <b>As occupancy</b>                 | -                   | 0.20      | 0.25           | -     | -                 |
| <b>As B-factors (Å<sup>2</sup>)</b> | -                   | 44.1      | 54.4           | -     | -                 |
| <b>PDB code</b>                     | 8C62                | 8C63      | 8C64           | 8RI5  | 8RI3              |

---

**Table S2** Anomalous signal close to Pt and As atoms in the structures of cisplatin/DNA, transplatin/DNA and AP-1/DNA adducts. Pt and As occupancies are also reported.

| Structure                     | Resolution (Å) | Sigma level ( $\sigma$ )/Occupancy |            |            |            |           |           |
|-------------------------------|----------------|------------------------------------|------------|------------|------------|-----------|-----------|
|                               |                | Pt 1                               | Pt 2       | Pt 3       | Pt 4       | As 2      | As 3      |
| Cisplatin/DNA adduct          | 2.31           | 9.91/0.50                          | 11.65/0.60 | 10.01/0.50 | 13.85/0.65 | -         | -         |
| AP-1/DNA adduct (4 h)         | 1.52           | 8.24/0.20                          | 23.55/0.20 | -          | -          | 5.21/0.20 | -         |
| AP-1/DNA adduct (48 h)        | 2.51           | 3.26/0.15                          | 5.92/0.40  | 2.89/0.25  | -          | -         | 4.04/0.25 |
| Transplatin/DNA adduct (48 h) | 1.41           | 12.46/0.20                         | -          | -          | -          | -         | -         |
| Transplatin/DNA adduct (7 d)  | 1.40           | 10.32/0.25                         | 6.35/0.30  | 4.24/0.30  | -          | -         | -         |

**Table S3.** X-ray structures of Pt-based drugs/DNA adducts reported in the PDB. Our structures are in bold

| DNA                                                                                    | Metallodrug                                                                                                                                                                                                                                                                              | Resolution (Å) | PDB code    | Space group                                        | Reference                                      | Cocrystallization or Soaking (time) | Binding sites                                        |
|----------------------------------------------------------------------------------------|------------------------------------------------------------------------------------------------------------------------------------------------------------------------------------------------------------------------------------------------------------------------------------------|----------------|-------------|----------------------------------------------------|------------------------------------------------|-------------------------------------|------------------------------------------------------|
| <b>[d(CGCGAATTCGCG)]<sub>2</sub></b>                                                   | <b>cisplatin</b>                                                                                                                                                                                                                                                                         | <b>2.31</b>    | <b>8C62</b> | <b>P 2<sub>1</sub> 2<sub>1</sub> 2<sub>1</sub></b> | -                                              | <b>Soaking (6 days)</b>             | <b>Binding of Pt to Gua4, Gua10, Gua16 and Gua22</b> |
| <b>[d(CGCGAATTCGCG)]<sub>2</sub></b>                                                   | <b>AP-1</b>                                                                                                                                                                                                                                                                              | <b>1.54</b>    | <b>8C63</b> | <b>P 2<sub>1</sub> 2<sub>1</sub> 2<sub>1</sub></b> | -                                              | <b>Soaking (4h)</b>                 | <b>Binding of Pt to Gua10 and Gua14</b>              |
| <b>[d(CGCGAATTCGCG)]<sub>2</sub></b>                                                   | <b>AP-1</b>                                                                                                                                                                                                                                                                              | <b>2.51</b>    | <b>8C64</b> | <b>P 2<sub>1</sub> 2<sub>1</sub> 2<sub>1</sub></b> | -                                              | <b>Soaking (48h)</b>                | <b>Binding of Pt to Gua2, Gua10 and Gua14</b>        |
| <b>[d(CGCGAATTCGCG)]<sub>2</sub></b>                                                   | <b>transplatin</b>                                                                                                                                                                                                                                                                       | <b>1.41</b>    | <b>8RI5</b> | <b>P 2<sub>1</sub> 2<sub>1</sub> 2<sub>1</sub></b> | -                                              | <b>Soaking (48 h)</b>               | <b>Binding of Pt to Gua16</b>                        |
| <b>[d(CGCGAATTCGCG)]<sub>2</sub></b>                                                   | <b>transplatin</b>                                                                                                                                                                                                                                                                       | <b>1.40</b>    | <b>8RI3</b> | <b>P 2<sub>1</sub> 2<sub>1</sub> 2<sub>1</sub></b> | -                                              | <b>Soaking (7 days)</b>             | <b>Binding of Pt to Gua4, Gua10 and Gua16</b>        |
| 5'-D(*DCP*DCP*DTP*DCP*DTP*DCP*DGP*DTP*DCP*DTP*DCP*DC)-3'                               | <i>cis</i> -{Pt(NH <sub>3</sub> ) <sub>2</sub> (pyridine)} <sup>2+</sup>                                                                                                                                                                                                                 | 2.16           | 3CO3        | C 2 2 2 <sub>1</sub>                               | (2008) Proc Natl Acad Sci U S A 105: 8902-8907 | n/A                                 | Binding of Pt to Gua7                                |
| <b>[d(CGCGAATTCGCG)]<sub>2</sub></b>                                                   | {Pt(ammine)(cyclohexylamine)} <sup>2+</sup>                                                                                                                                                                                                                                              | 2.40           | 1LU5        | P 1                                                | (2002) J. Biol. Chem. 277: 49743-49749         | n/A                                 | Binding of Pt to Gua6 and Gua7                       |
| <b>[d(CGCGAATTCGCG)]<sub>2</sub></b>                                                   | [[ <i>trans</i> -Pt-(NH <sub>3</sub> ) <sub>2</sub> (NH <sub>2</sub> (CH <sub>2</sub> ) <sub>6</sub> (NH <sub>3</sub> <sup>+</sup> )) <sub>2</sub> -μ- <i>trans</i> -Pt(NH <sub>3</sub> ) <sub>2</sub> (NH <sub>2</sub> (CH <sub>2</sub> ) <sub>6</sub> NH <sub>2</sub> )] (TriplatinNC) | 1.13           | 2DYW        | P 2 <sub>1</sub> 2 <sub>1</sub> 2 <sub>1</sub>     | (2006) J. Am. Chem. Soc. 128: 16092-16103      | Cocrystallization                   | -                                                    |
| 5'-D(*CP*CP*(BRU)P*CP*TP*[PT(NH <sub>3</sub> ) <sub>2</sub> (GP*GP)]*TP*CP*TP*CP*C)-3' | <b>cisplatin</b>                                                                                                                                                                                                                                                                         | 2.60           | 1AIO        | P 1                                                | (1995) Nature. <b>377</b> : 649-652            | Cocrystallization                   | Binding of Pt to Gua6 and Gua7                       |

|                                                      |                                          |      |      |                                                |                                                                      |                   |                                    |
|------------------------------------------------------|------------------------------------------|------|------|------------------------------------------------|----------------------------------------------------------------------|-------------------|------------------------------------|
| 5'-<br>D(*CP*CP*TP*CP*TP*GP*G<br>P*TP*CP*TP*CP*C)-3' | oxaliplatin                              | 2.40 | 1IHH | I 2 2 2                                        | (2001) Inorg.<br>Chem. <b>40</b> : 5596-<br>5602                     | Cocrystallization | Binding of Pt to Gua6 and<br>Gua7  |
| 5'-<br>D(*CP*GP*TP*(1AP)P*CP*(<br>PT(NH3)3)G)-3'     | [(NH <sub>3</sub> ) <sub>3</sub> ClPt]Cl | 1.60 | 211D | P 3 <sub>2</sub> 2 1                           | (1995) Biochem. 34:<br>15487-15495                                   | Soaking (3 weeks) | Binding of Pt to Gua6              |
| 5'-<br>D(*CP*CP*TP*CP*TP*GP*G<br>P*TP*CP*TP*CP*C)-3' | cisplatin                                | 1.77 | 3LPV | P 1                                            | (2010) J. Inorg.<br>Biochem. <b>104</b> : 902-<br>908                | Cocrystallization | Binding of Pt to Gua6 and<br>Gua7  |
| (5'-<br>D(*GP*(2ST)P*GP*GP*CP*C<br>P*AP*C)-3'        | -                                        | 1.42 | 4H5A | P 4 <sub>3</sub> 2 <sub>1</sub> 2              | n/A                                                                  | n/A               | Binding of Pt to Gua4              |
| 5'-<br>D(*GP*(2ST)P*GP*GP*CP*C<br>P*AP*C)-3'         | -                                        | 1.25 | 4I1G | P 4 <sub>3</sub> 2 <sub>1</sub> 2              | n/A                                                                  | n/A               | Binding of Pt to Gua 1 and<br>Gua4 |
| 5'-D(*GP*TP*AP*CP*G)-3'                              | Pt(H <sub>2</sub> bapbpy)]               | 2.30 | 6F3C | P 3 <sub>2</sub> 2 1                           | (2019) Angew.<br>Chem. Int. Ed. Engl.<br>58: 9378-9382               | Soaking           | Close to Gua2                      |
| [d(CGCGAATTCGCG)] <sub>2</sub> )                     | cisplatin                                | 2.60 | 5BNA | P 2 <sub>1</sub> 2 <sub>1</sub> 2 <sub>1</sub> | (1984) EMBO J. 3:<br>1201-1206                                       | Soaking           | Binding of Pt to Gua4 and<br>Gua10 |
| 5'-<br>D(*CP*CP*TP*CP*GP*CP*T<br>P*CP*TP*C)-3'       | cisplatin                                | 1.63 | 1I1P | C 1 2 1                                        | (2002) Acta<br>Crystallogr. D. Biol.<br>Crystallogr. 58: 431-<br>440 | Cocrystallization | Binding of Pt to Gua5              |
| 5'-<br>D(*CP*CP*TP*CP*GP*CP*T<br>P*CP*TP*C)-3'       | cisplatin                                | 1.63 | 1A2E | C 1 2 1                                        | (1999) Nucleic<br>Acids Res. 27: 1837-<br>1846                       | Cocrystallization | Binding of Pt to Gua5              |

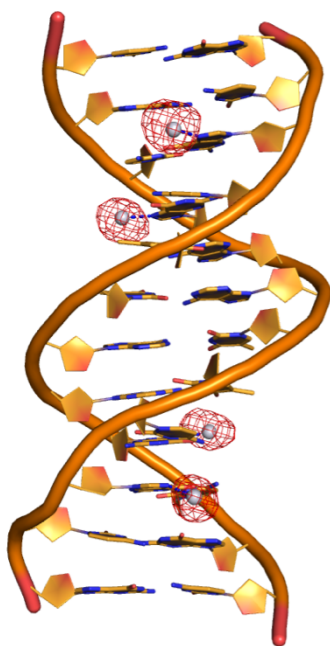

**Fig. S1** Anomalous difference electron density maps (red,  $3.0 \sigma$ ) around the Pt centers in the cisplatin/DNA adduct.



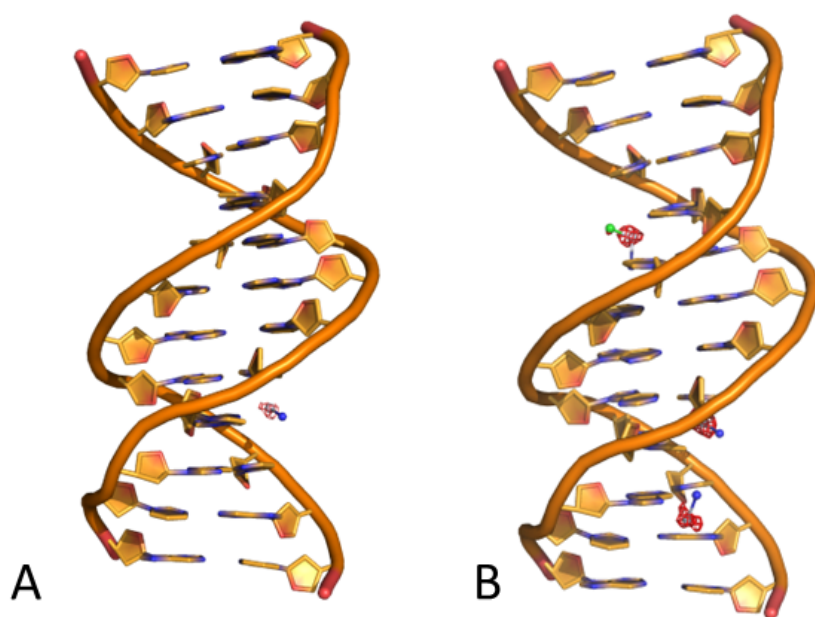

**Fig. S2** Anomalous difference electron density maps at  $3.0 \sigma$  (red) around Pt centers in the transplatin/DNA adducts obtained upon (A) 48 h and (B) 7 days of soaking.

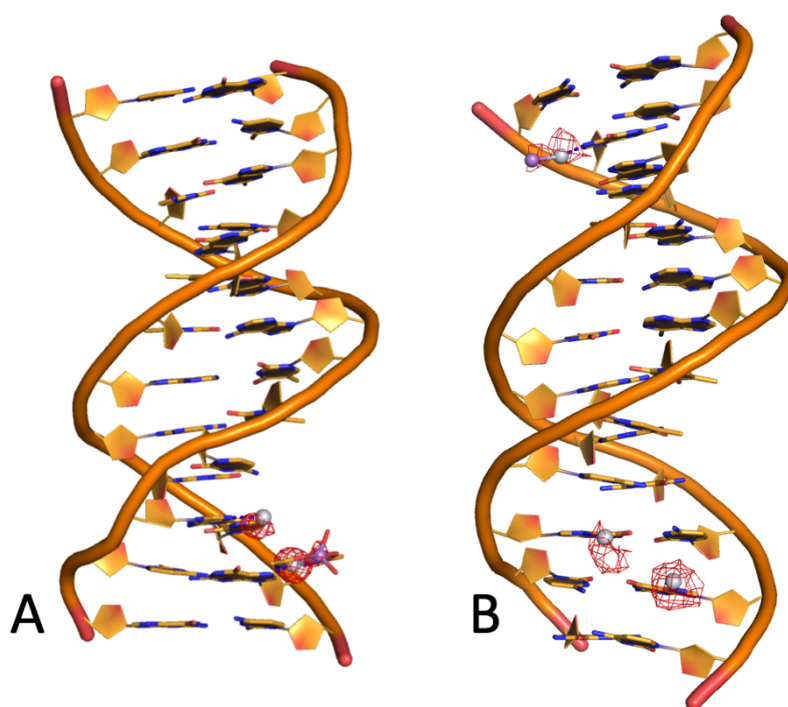

**Fig. S3** Anomalous difference electron density maps (red) around Pt and As in the AP-1/DNA adducts obtained upon (A) 4 h ( $3.0 \sigma$  value) and (B) 48 h ( $2.0 \sigma$  value) of soaking.

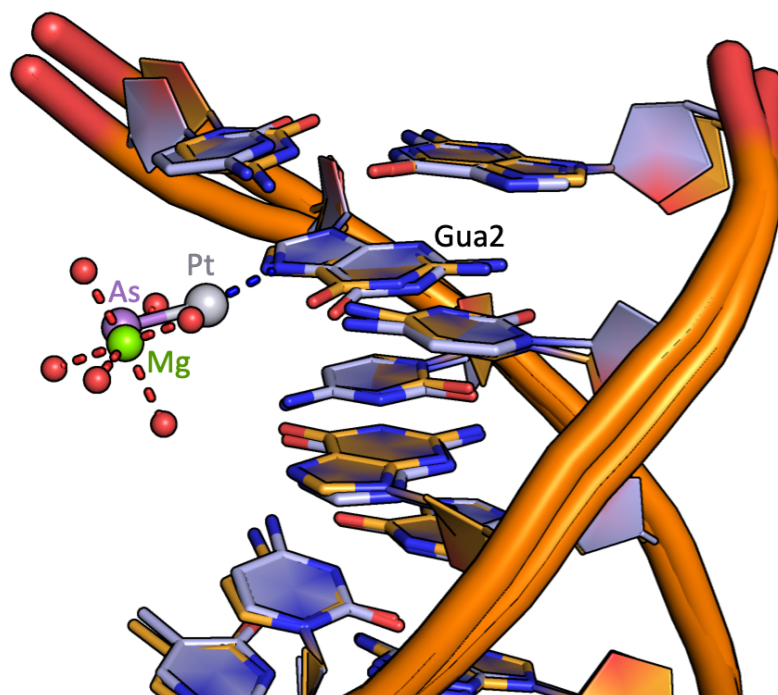

**Fig. S4** Superimposed structures of AP-1/DNA adducts formed upon 4 (orange) and 48 h (light blue) of soaking. The hexaaqua magnesium ion observed in the structure of the adduct formed upon 4 h of soaking occupies almost the same position adopted by Pt-As bimetallic center in the AP-1/DNA adducts obtained upon 48 h of soaking.

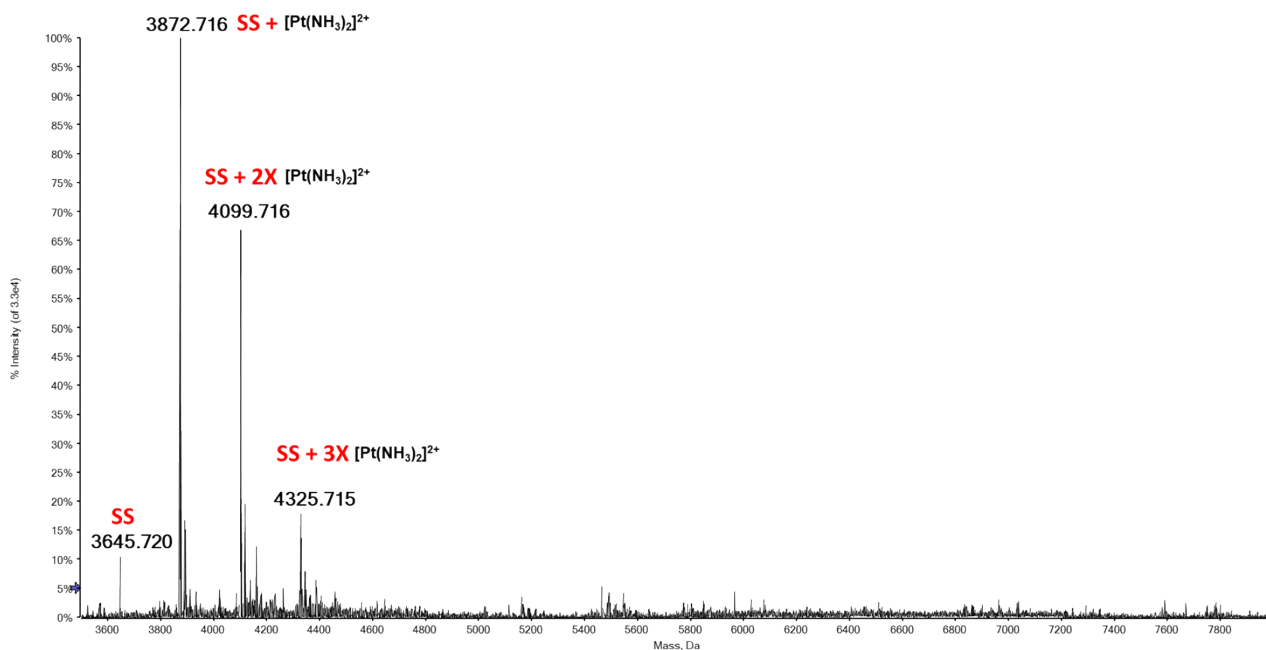

**Fig. S5** ESI MS spectrum of the Dickerson sequence (5'-CGCGAATTCGCG-3') and cisplatin, metal complex to DNA ratio 3:1, incubated for 48 h in 100 mM ammonium acetate buffer (pH=6.8) at the concentration of  $10^{-4}$  M.

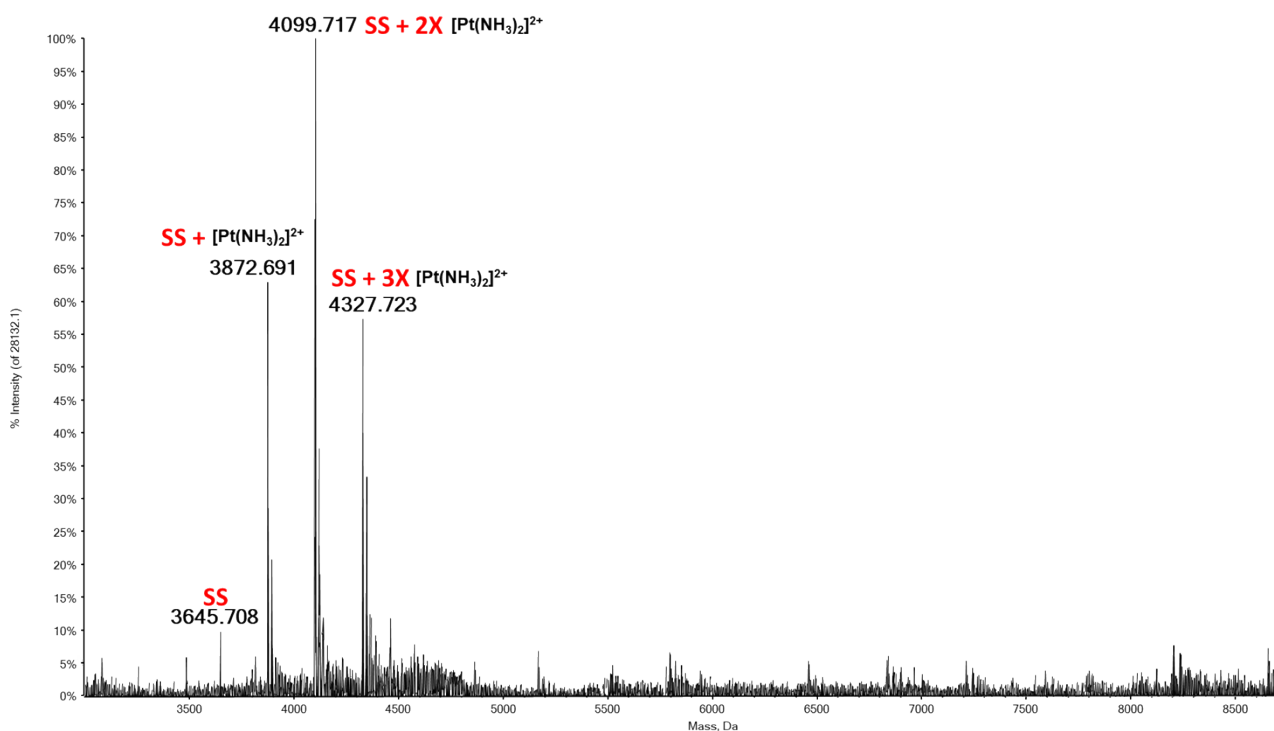

**Fig. S6** ESI MS spectrum of the Dickerson sequence (5'-CGCGAATTCGCG-3') and transplatin, metal complex to DNA ratio 3:1, incubated for 48 h in 100 mM ammonium acetate buffer (pH=6.8) at the concentration of  $10^{-4}$  M.

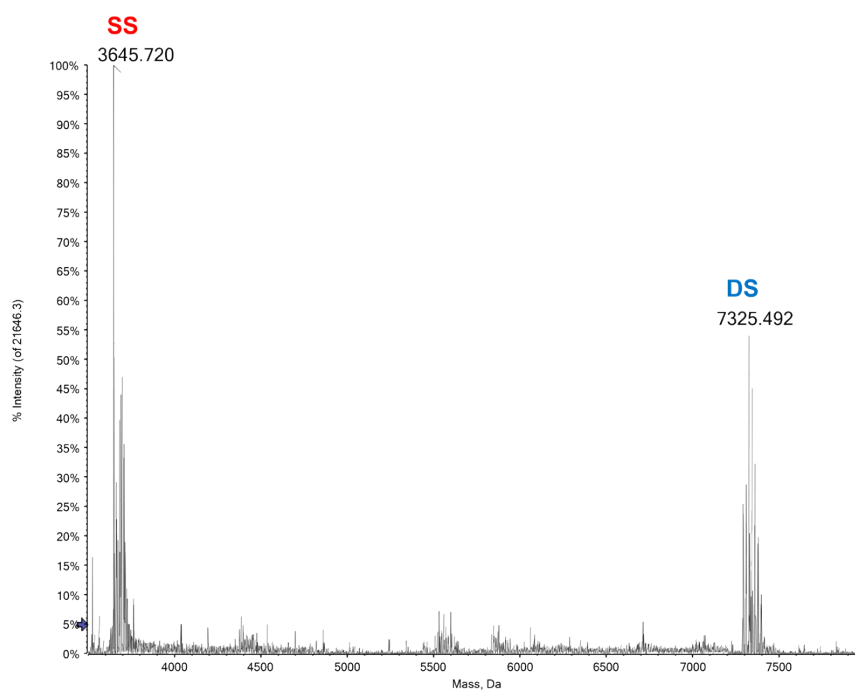

**Fig. S7** ESI MS spectrum of the Dickerson sequence (5'-CGCGAATTCGCG-3') and AP-1, metal complex to DNA ratio 3:1, incubated for 24 h in 100 mM ammonium acetate buffer (pH=6.8) at the concentration of  $10^{-4}$  M.
